# Supplementary material for: l-Serine Lowers the Inflammatory Responses during Pasteurella multocida Infection
Source: PubMed Central journal article supplement (PMC6867830; doi:10.1128/iai.00677-19), 2019-11-18
Supplement: IAI.00677-19-s0003.pdf [file IAI.00677-19-s0003.pdf]

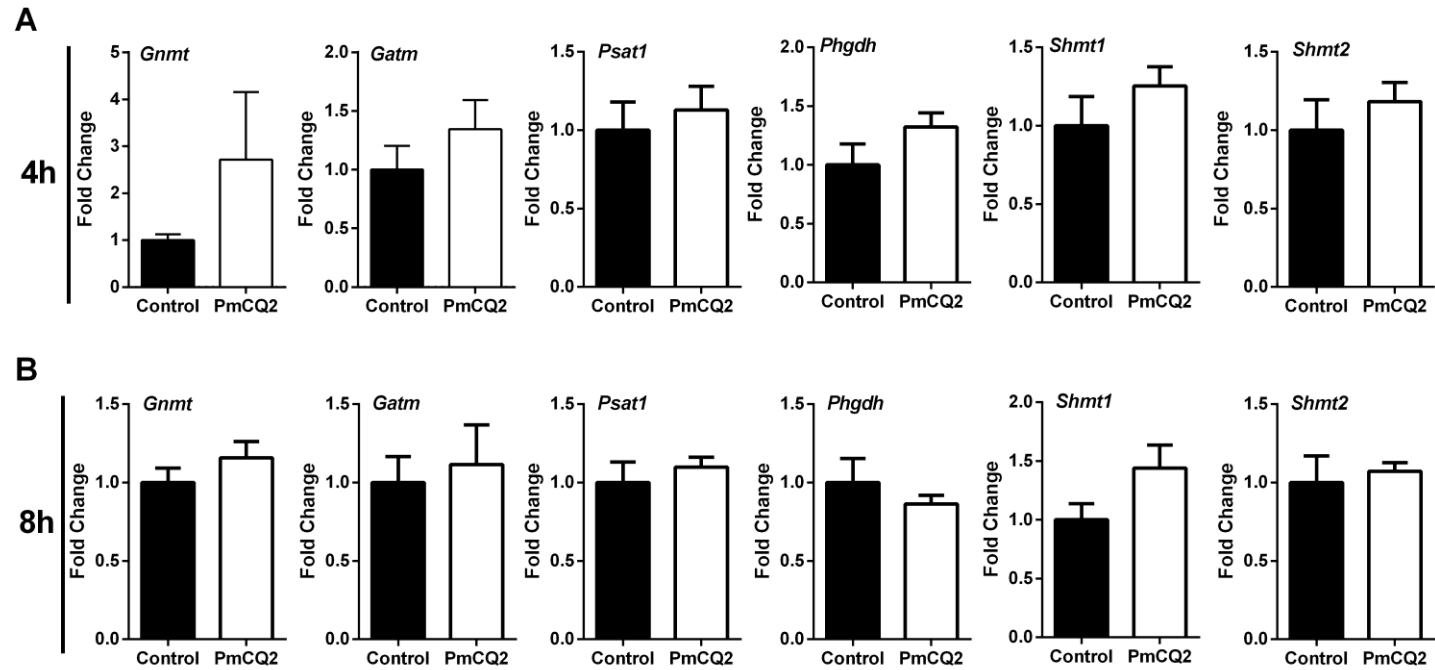

**FIG S1** Gene expression of L-serine metabolism-related enzymes after *P. multocida* infection. **(A)** Gene expression of L-serine metabolism-related enzymes at 4h post infection (n=6). **(B)** Gene expression of L-serine metabolism-related enzymes at 8h post infection (n=6). The data were analyzed with unpaired t test or Mann-Whitney test and were expressed as means  $\pm$  SEM.

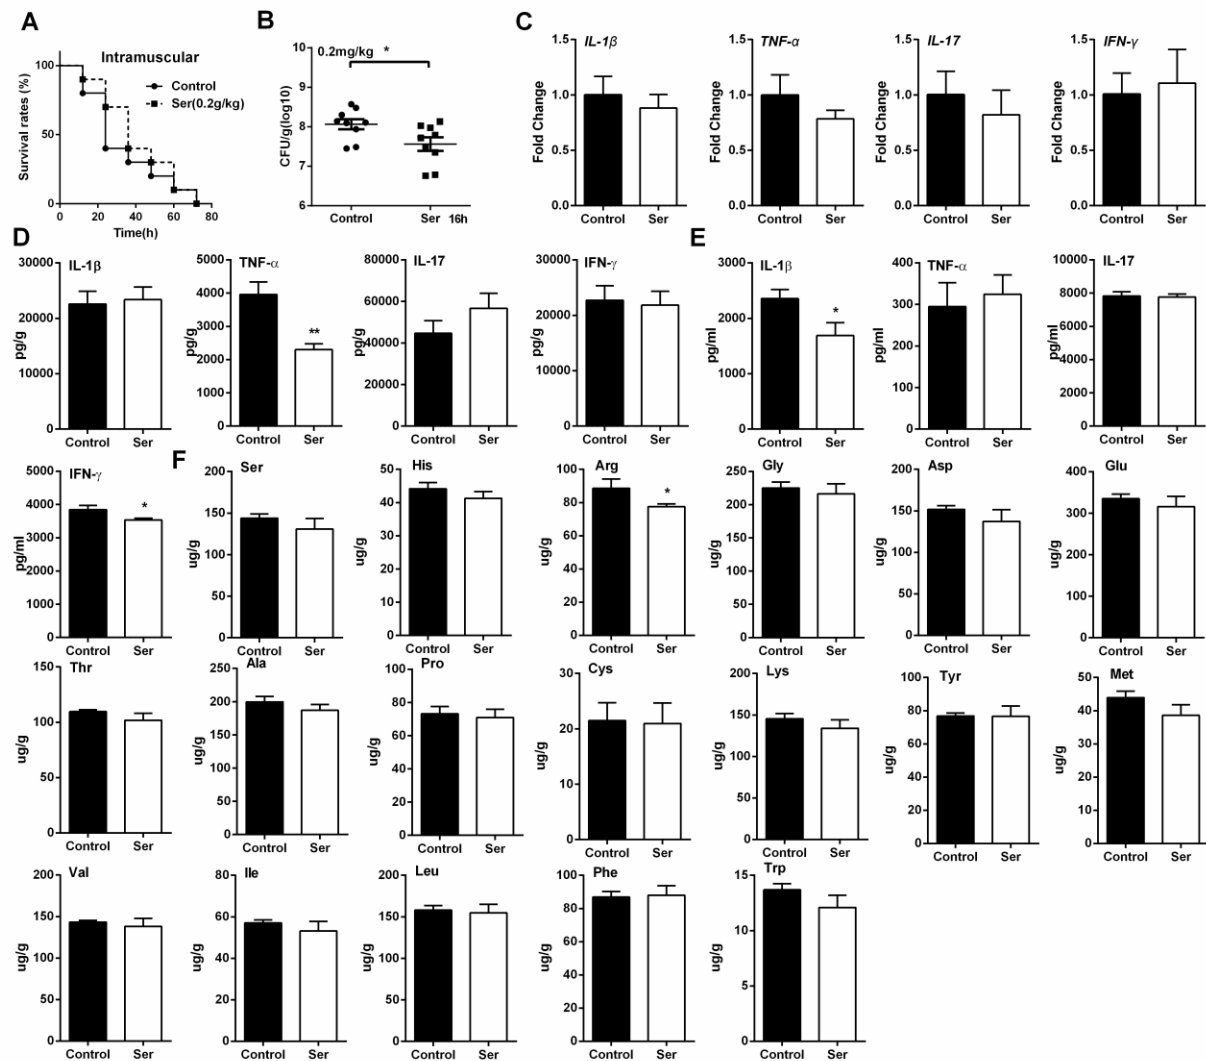

**FIG S2** The effect of exogenous addition of L-serine via intramuscular injection on the mice infected by *P. multocida* infection. **(A)** The survival rate of mice by *P. multocida* infection after exogenous L-serine (0.2g/kg) addition via intramuscular injection (n=10). **(B)** The colonization of *P. multocida* in the lung at 16h post infection after exogenous L-serine (0.2g/kg) addition via intramuscular injection (n=9). **(C)** The expression of inflammatory factors after exogenous addition of L-serine (0.2g/kg) in lung tissues at 16h post infection by *P. multocida* (n=9). **(D-E)** The production of inflammatory cytokines after exogenous addition of L-serine (0.2g/kg) in lung tissues and serum at 16h post infection by *P. multocida* (n=9). **(F)** Exogenous addition 0.2g/kg L-serine did not affect the levels of amino acids in mice lungs at 16h post *P. multocida* infection (n=9). Data were analyzed by unpaired t-test or Mann-Whitney test and shown as the means  $\pm$  SEM. \*P < 0.05.

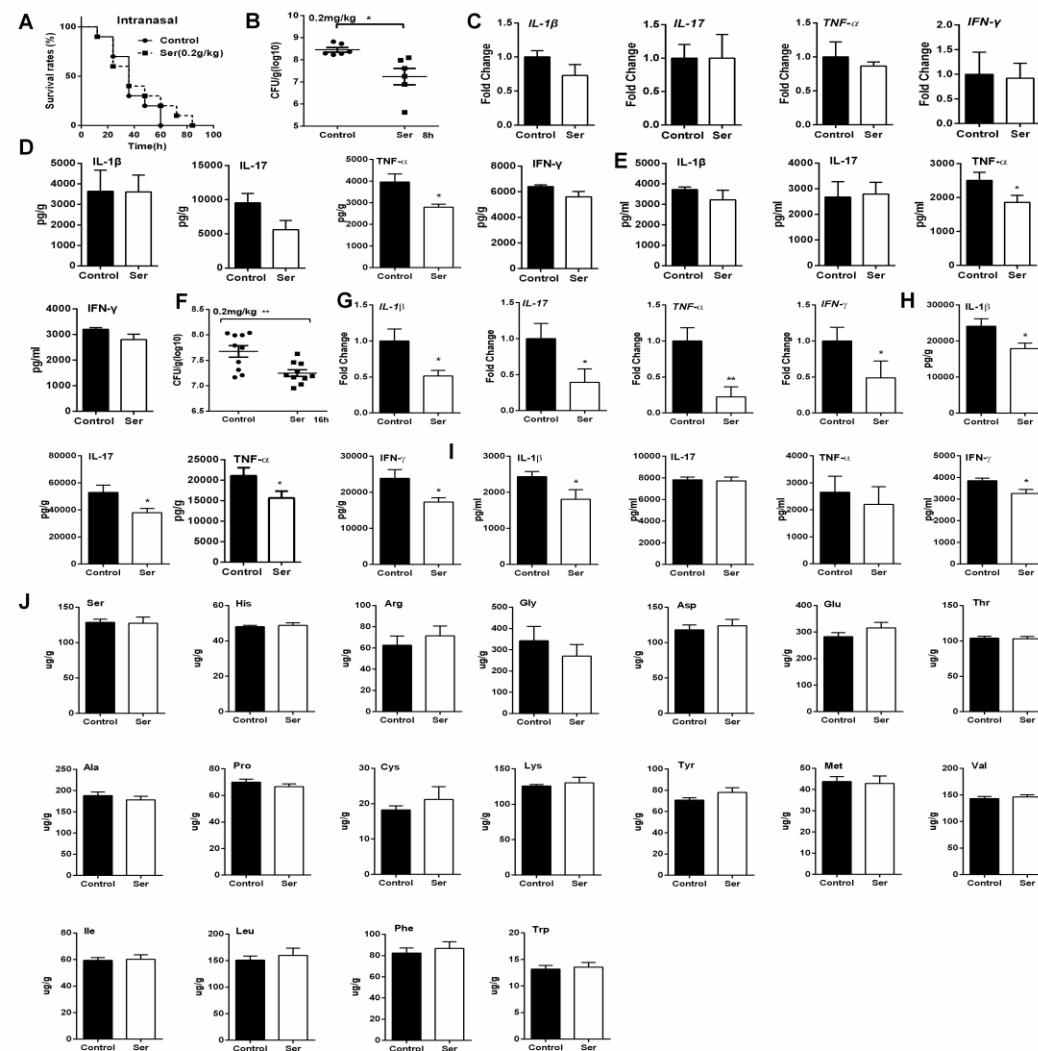

**FIG S3** Effects of intranasal injection of 0.2g/kg L-serine on mice infected by *P. multocida*. **(A)** The survival rate of mice infected by *P. multocida* (n=10). **(B)** The bacterial colonization in the lungs of mice at 8h post *P. multocida* infection (n=6) **(C)** The expression of inflammatory factors through qRT-PCR at 8h post *P. multocida* infection (n=6). **(D-E)** The production of inflammatory cytokines in lung tissues and serum at 8h post infection by *P. multocida* (n=6). **(F)** The bacterial colonization in the lungs of mice at 16h post *P. multocida* infection (n=10). **(G)** The expression of inflammatory factors at 16h post *P. multocida* infection (n=10). **(H-I)** The production of inflammatory cytokines in lung tissues and serum at 16h post infection by *P. multocida* (n=10). **(J)** Exogenous addition 0.2g/kg L-serine via intranasal injection does not affect the levels of amino acids in the lung tissues of mice by *P. multocida* at 16h post infection (n=6). **(A)**, **(B)** and **(F)** were representative of three independent experiments (n = 6-10 total mice per group). **(C)-(E)** and **(G)-(I)** were pooled from two independent experiments (n = 6-10 total mice per group). Data were analyzed by unpaired t-test or Mann-Whitney test and expressed as means means  $\pm$  SEM. \*P < 0.05, \*\*P < 0.01.

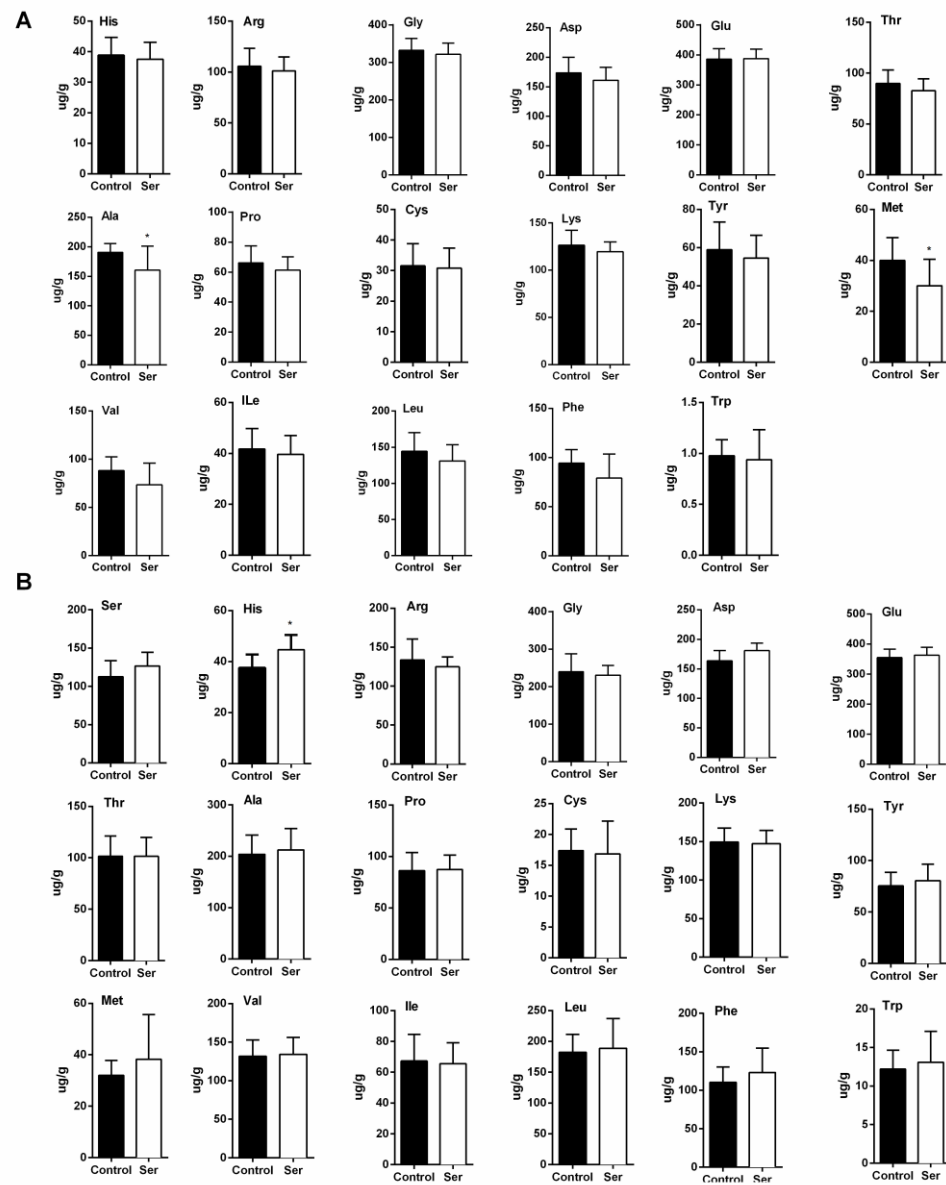

**FIG S4** The levels of amino acids in the lungs of mice by *P. multocida* after exogenously adding of L-serine (2g/kg) at 8h and 16h post infection. **(A)** The concentration of amino acids in lung tissues of mice after adding of L-serine (2mg/kg) by intranasal injection at 8h post *P. multocida* infection (n=10). **(B)** The concentration of amino acids in lung tissues of mice after adding of L-serine (2mg/kg) by intranasal injection at 16h post *P. multocida* infection (n=6). The data were analyzed with unpaired t test and expressed as means  $\pm$  SEM. \*P < 0.05.

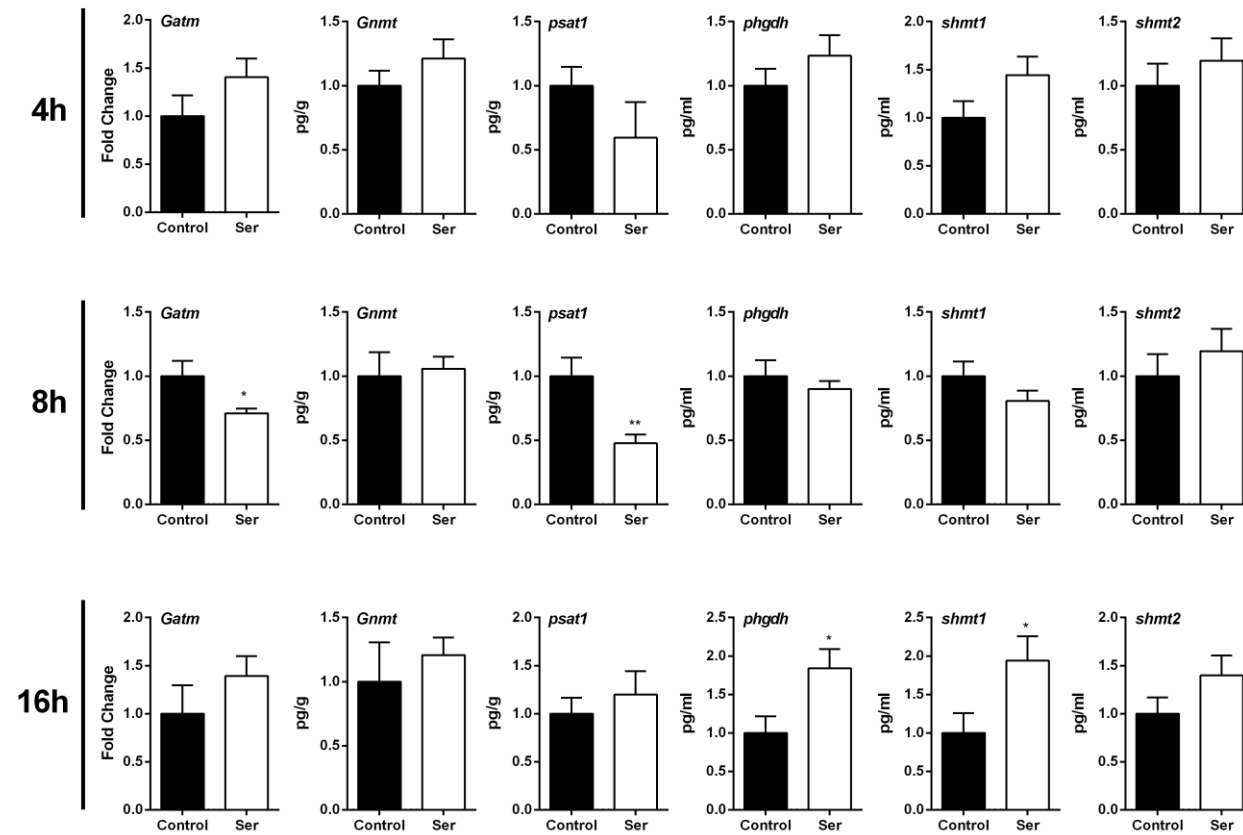

**FIG S5** Expression of L-serine metabolism-related enzymes in the lungs of mice at 4h, 8h and 16h post infection by *P. multocida* after exogenously adding of L-serine (2g/kg, n = 6-10). The data were analyzed with unpaired t test and shown as means  $\pm$  SEM. \*P < 0.05.

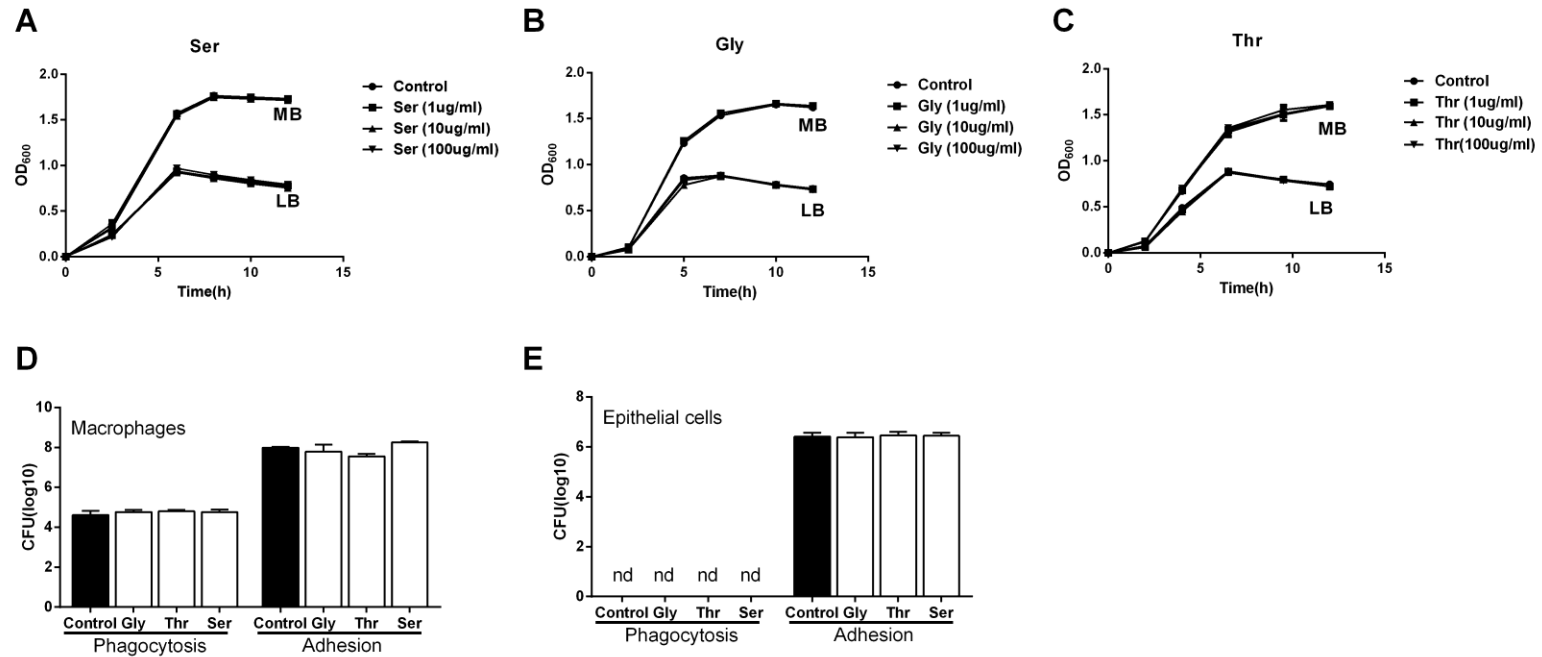

**FIG S6** The effect of glycine, threonine and serine on the growth and adherence of *P. multocida*. The growth of *P. multocida* was analyzed after serine (A), glycine (B) and threonine (C) supplementation (n=3). The adherence of *P. multocida* to macrophages (D) and epithelial cells (E) were analyzed after serine, glycine and threonine supplementation (n=6). (A)-(C) are representative of three independent experiments with 8 replicates in each time, (D) and (E) were pooled from two independent experiments (n = 6). (A), (B), and (C) was determined with unpaired t test, (D) and (E) were analyzed with one-way ANOVA, and data were expressed as means  $\pm$  SEM.
